# Supplementary material for: Carrier tuning of 2D electron gas in field-effect devices based on Al2O3/ZnO heterostructures
Source: Royal Society of Chemistry journal article supplement (doi:10.1039/d3nr00157a), 2023-01-01
Supplement: d3nr00157a1.pdf [file d3nr00157a1.pdf]

## Supporting Information

### **Carrier Tuning of 2D Electron Gas Field-Effect Devices Based on Al<sub>2</sub>O<sub>3</sub>/ZnO Heterostructures**

*Xinyi Zhu,<sup>a</sup> Tianbao Zhang,<sup>a</sup> Yongjie He,<sup>a</sup> Yuhang Liu<sup>b,\*</sup> and Hao Zhu<sup>a,\*</sup>*

<sup>a</sup>State Key Laboratory of ASIC and System, School of Microelectronics, Fudan University,  
Shanghai 200433, China

<sup>b</sup>Institute of Semiconductor Manufacturing Research, College of Mechatronics and Control  
Engineering, Shenzhen University, Shenzhen, Guangdong, 518060, China

\*E-mail: [yh\\_liu@szu.edu.cn](mailto:yh_liu@szu.edu.cn); [hao\\_zhu@fudan.edu.cn](mailto:hao_zhu@fudan.edu.cn)

As shown in Figure S1, the Al<sub>2</sub>O<sub>3</sub> layer is in amorphous state, and the ZnO films are polycrystalline (improved crystallization observed with 25 nm thickness sample). As discussed in the main text, the electron accumulation at the interface of Al<sub>2</sub>O<sub>3</sub>/ZnO heterostructure is free from “polar catastrophe” with charge mismatch effect, and can be explained by redox reaction at the ZnO surface during Al<sub>2</sub>O<sub>3</sub> deposition. The selected area electron diffraction and fast Fourier transform (FFT) in Figure S2 indicate the (101), (002), and (100) planes of wurtzite for 7.5 nm annealed ZnO film.

Figure S3 shows the X-ray photoelectron spectroscopy (XPS) spectra of 7.5 nm annealed ZnO with and without Al<sub>2</sub>O<sub>3</sub> overlayer. The Zn 2p XPS spectra of Al<sub>2</sub>O<sub>3</sub>/ZnO is obtained at the depth near the interface of Al<sub>2</sub>O<sub>3</sub>/ZnO by using Ar etching. The Zn 2p peak around 1022 eV is deconvoluted into two Gaussian curves of Zn species: O-deficient Zn<sup>0-1+</sup> (1021.8 eV), and full oxidation Zn<sup>2+</sup> (1022.3 eV). Compared to the single-layer ZnO, the Al<sub>2</sub>O<sub>3</sub>/ZnO shows an increased ratio of Zn<sup>0-1+</sup>/Zn<sup>2+</sup> peak area, which suggests that more Zn<sup>0-1+</sup> species are induced in the interface due to the chemical reduction on the ZnO surface.

From Figure S4, the generated electrons show a carrier density of  $\sim 2 \times 10^{14}$  cm<sup>-2</sup> and Hall mobility of 20~30 cm<sup>2</sup>V<sup>-1</sup>s<sup>-1</sup> after 25 cycles of ALD Al<sub>2</sub>O<sub>3</sub> (~2.5 nm), which remains stable with thicker Al<sub>2</sub>O<sub>3</sub> thickness. Figure S5 shows the temperature-dependent conductivity for Al<sub>2</sub>O<sub>3</sub>/ZnO. According to the slope of the Arrhenius curves, the activation energy (E<sub>a</sub>) for electrons released from V<sub>o</sub>-related donor levels is larger in thinner as-grown ZnO films, which has great impact on the carrier density of 2DEG.

The energy band diagrams of Al<sub>2</sub>O<sub>3</sub>/ZnO-based FET with top gate and back gate modes are shown in Figure S6 to further understand the operation principle of 2DEG FETs. Top gate and back gate manipulate the bottom and tail electrostatic boundary conditions of the asymmetric

quantum well, respectively. Figure S7 compares the drain current ( $I_D$ ) of the back-gate FETs with annealed and as-grown ZnO. The current of  $Al_2O_3/ZnO$  channel increases with increasing thickness and annealing process of ZnO underlayer, which is consistent with the Hall result of sheet carrier density. The improved crystallinity of ZnO underlayers facilitates the formation of 2DEG. Figure S8 shows the hysteresis characteristic in the transfer curve of a 2DEG back-gate device, indicating a slight positive  $V_{th}$  shift of 1 V by electron trapping from 2DEG channel to gate dielectric layers.

From the transfer characteristics shown in Figure S9, improved transfer curves are observed upon engineered top-gate FET structure with optimized thickness control and annealing process of ZnO underlayer. The threshold voltage ( $V_{th}$ ) and switching speed of FETs are significantly increased by decreasing ZnO thickness to 7.5 nm. On/off ratio ( $I_{on}/I_{off}$ ) over  $10^8$  is obtained for 7.5 nm ZnO with annealing due to high  $n_s$  and more 2DEG-like carriers. The  $I_G$  values of all top-gate FETs are below  $\sim 10^{-11}$  A, as shown in Figure S10. An increase of  $I_G$  at high negative  $V_G$  for 15 nm ZnO-based FETs is caused by low channel resistance and high electric field on the gate dielectric.

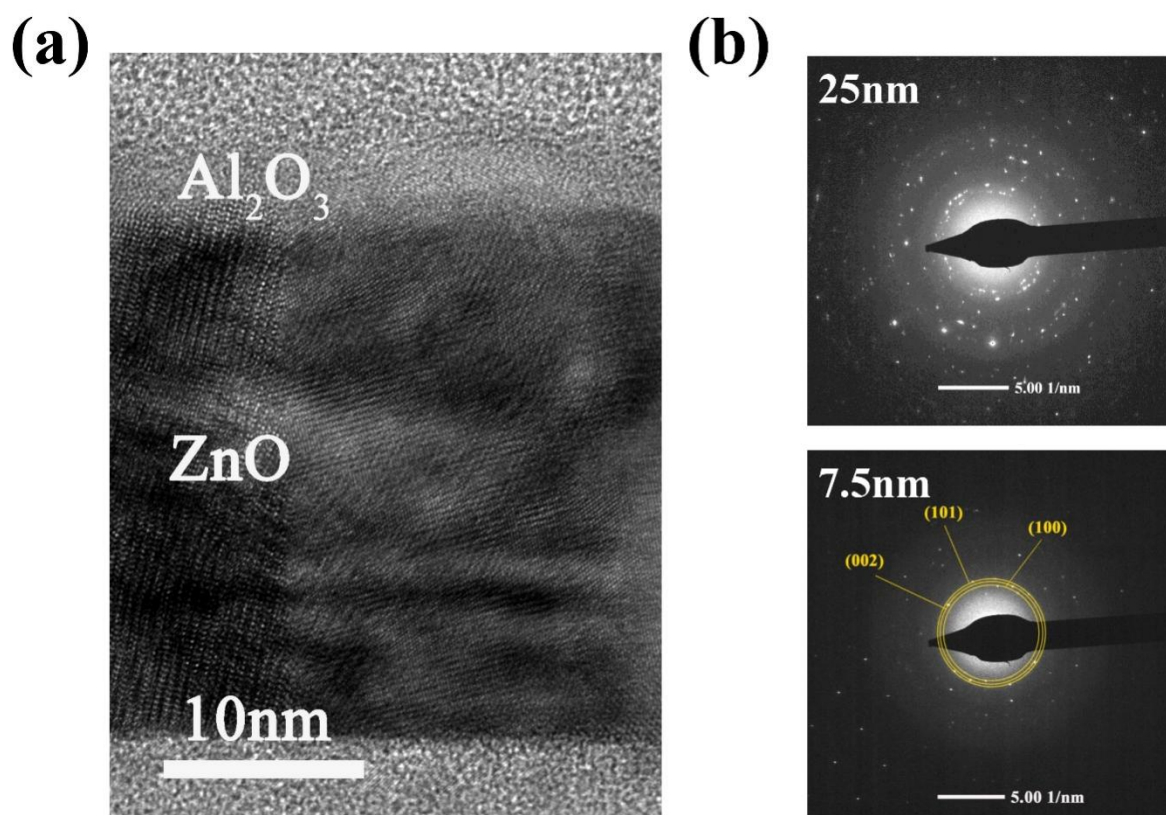

**Figure S1.** (a) TEM image of  $\text{Al}_2\text{O}_3/\text{ZnO}$  heterostructure with 25 nm annealed ZnO. (b) Diffraction patterns of annealed ZnO underlayer with 25 nm and 7.5 nm thickness, respectively, in  $\text{Al}_2\text{O}_3/\text{ZnO}$  heterostructures.

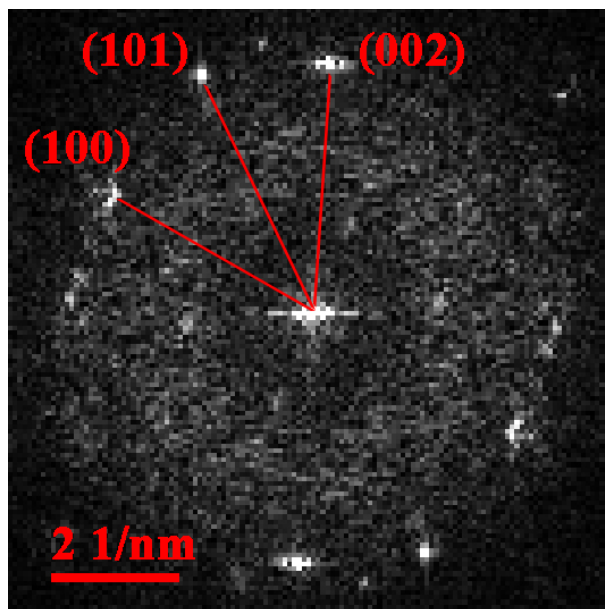

Figure S2. FFT image of the ZnO region in TEM image for Al<sub>2</sub>O<sub>3</sub>/7.5 nm annealed ZnO.

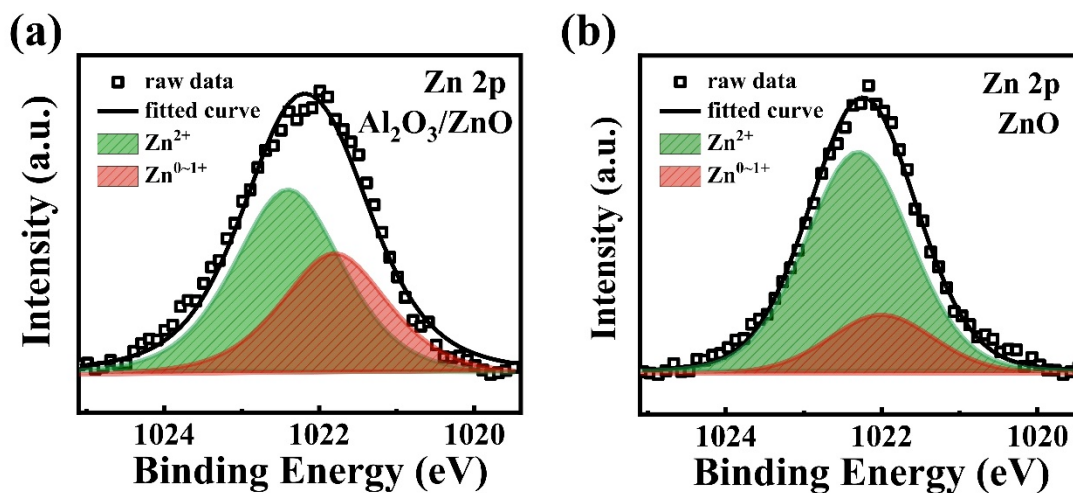

Figure S3. XPS analysis in normalized Zn 2p spectra of 7.5 nm annealed ZnO (a) with and (b) without Al<sub>2</sub>O<sub>3</sub> overlayer, respectively.

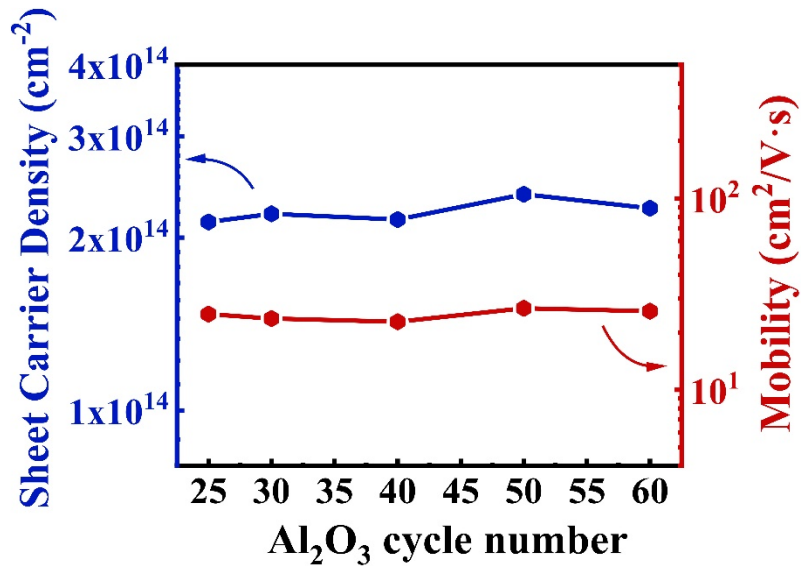

**Figure S4.** Sheet carrier density and Hall mobility of Al<sub>2</sub>O<sub>3</sub>/ZnO with 25 nm annealed ZnO as a function of Al<sub>2</sub>O<sub>3</sub> cycle number obtained from Hall measurement.

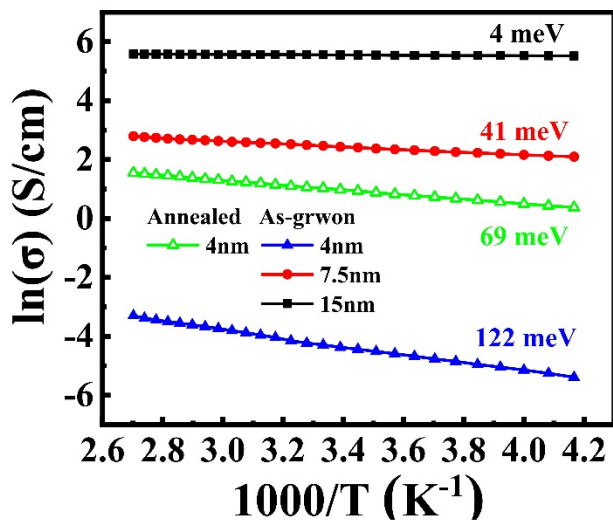

**Figure S5.** Temperature dependence of conductivity of various Al<sub>2</sub>O<sub>3</sub>/ZnO heterostructures.

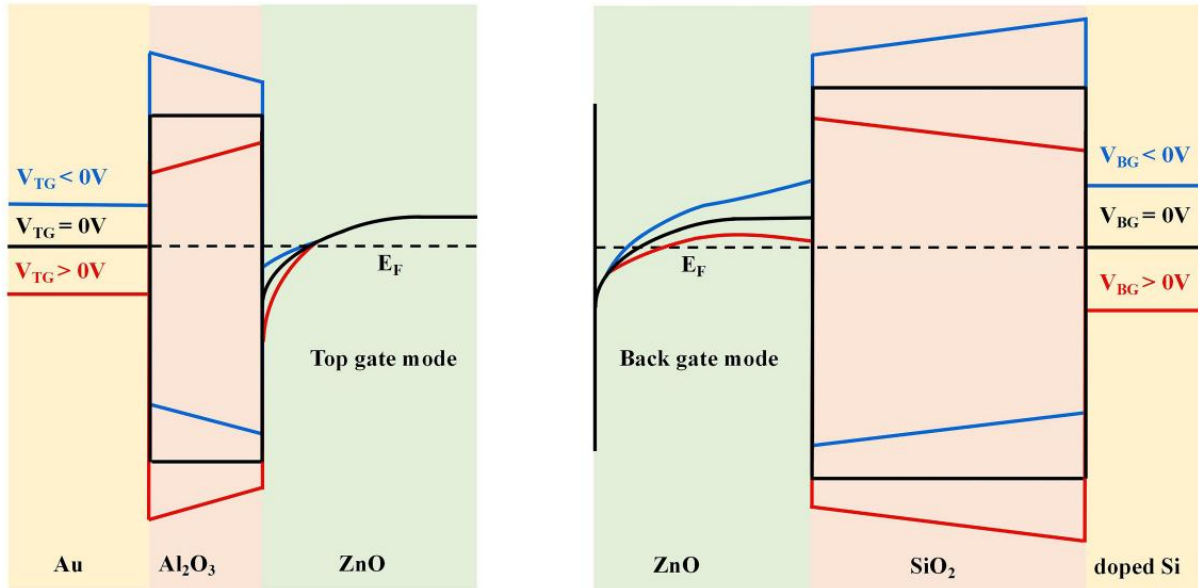

**Figure S6.** Energy band diagram of Al<sub>2</sub>O<sub>3</sub>/ZnO-based FET for top gate (left) and back gate (right) modes, respectively.

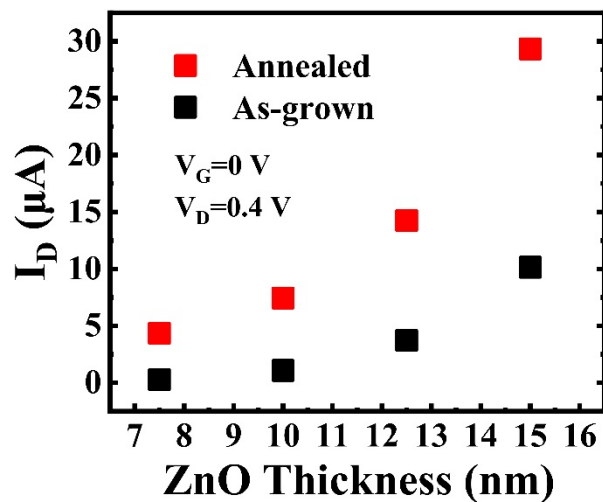

**Figure S7.** Drain current (I<sub>D</sub>) of the back-gate FETs with annealed and as-grown ZnO, respectively, as a function of ZnO thickness. The length/width of the channel (L<sub>C</sub>/W<sub>C</sub>) is 20 μm/10 μm and I<sub>D</sub> is measured at V<sub>G</sub> of 0 V and V<sub>D</sub> of 0.4 V.

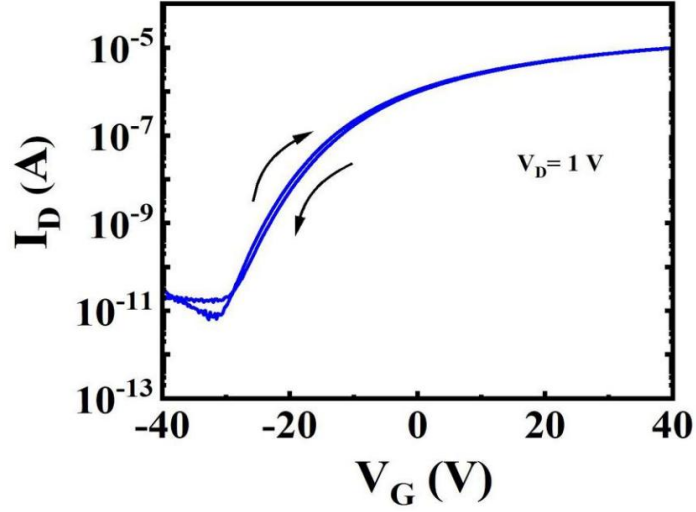

**Figure S8.** Hysteresis characteristic in the transfer curve of a 2DEG back-gate device with 7.5 nm annealed ZnO. The  $V_{BG}$  was continuously varied from -40 V to 40 V, then back to -40 V. The  $L_C/W_C$  is 20  $\mu\text{m}/10 \mu\text{m}$  and  $V_D$  is 1 V.

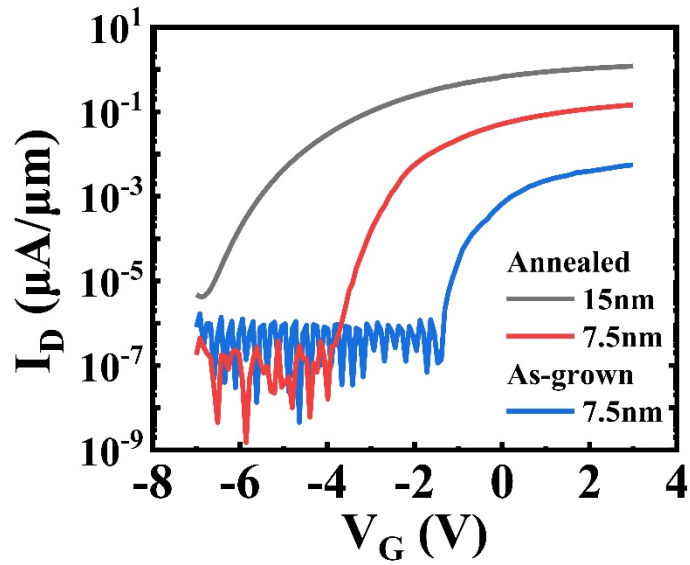

**Figure S9.** Transfer curves of top-gate  $\text{Al}_2\text{O}_3/\text{ZnO}$ -based 2DEG FETs with various ZnO underlayers. The  $L_C/W_C$  is 20  $\mu\text{m}/10 \mu\text{m}$  and  $V_D$  is 0.5 V.



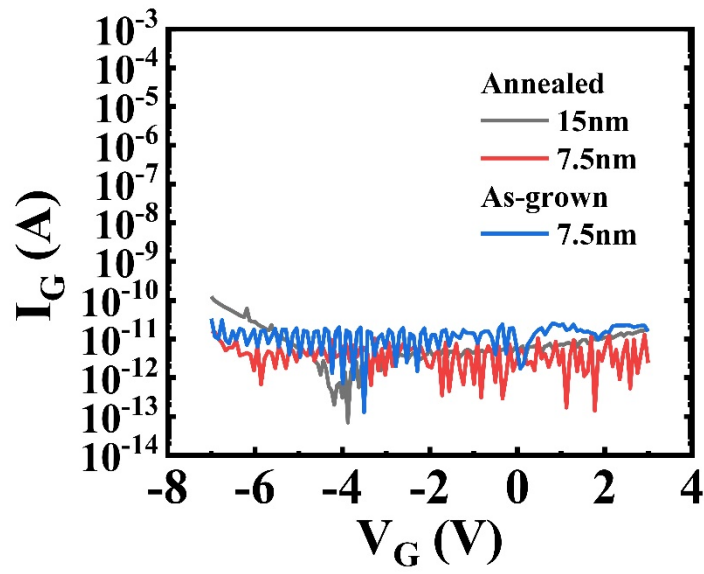

**Figure S10.** Gate leakage current ( $I_G$ ) of top-gate  $\text{Al}_2\text{O}_3/\text{ZnO}$ -based 2DEG FETs as a function of gate voltage. The  $L_C/W_C$  is  $20 \mu\text{m}/10 \mu\text{m}$  and  $V_D$  is 0.5 V.
